# Supplementary material for: Road construction effects on estuarine wetland soil organic carbon and heavy metals: evidence for near-road disturbance thresholds and buffer zoning
Source: Research Square preprint supplement (doi:10.21203/rs.3.rs-8357958/v1), 2025-12-19
Supplement: Supplementary file 1 [file a94d8f995b9006eac5cac7a6.docx]

**Supplementary Information**

**Road construction effects on estuarine wetland soil organic carbon and heavy metals: evidence for near-road disturbance thresholds and buffer zoning**

**Content**

[Text S1. Calculation of soil properties and soil organic carbon stock 3](#_Toc215505815)

[S1.1 Soil bulk density and water content 3](#_Toc215505816)

[S1.2 Soil organic carbon and other chemical properties 3](#_Toc215505817)

[Text S2. Statistical analyses and model diagnostics 4](#_Toc215505818)

[S2.1 Linear mixed-effects models for distance effects 4](#_Toc215505819)

[S2.2 Segmented regression for SOC–distance relationships 4](#_Toc215505820)

[S2.3 Principal component analysis of soil–metal gradients 5](#_Toc215505821)

[S2.4 Model diagnostics and additional tests 5](#_Toc215505822)

[Table S1. Site and sampling design information 6](#_Toc215505823)

[Table S2. Summary statistics of soil properties in different distance classes from the road. 8](#_Toc215505824)

[Table S3. Summary statistics of heavy metal concentrations at different distances from the road 9](#_Toc215505825)

[Table S4 Fixed‐effect estimates from linear mixed‐effects models relating soil properties and heavy metals to distance from the road 10](#_Toc215505826)

[Table S5 Segmented regression results for the relationship between SOC and distance from the road 11](#_Toc215505827)

[Table S6 Loadings of soil properties and heavy metals on the first two principal components 12](#_Toc215505828)

[Table S7 Eigenvalues and variance explained by principal components 13](#_Toc215505829)

**Text S1. Calculation of soil properties and soil organic carbon stock**

All calculations were based on soil samples collected at 0–10, 10–20, 20–30 and 30–50 cm depths along each transect. Bulk density (BD), gravimetric water content (WC), and soil organic carbon (SOC) were first derived for each depth interval and sampling point, and then used to compute soil organic carbon stock for the 0–50 cm profile.

**S1.1 Soil bulk density and water content**

For each depth interval, bulk density (BD, g cm⁻³) was calculated from undisturbed core samples as

where is the oven-dry mass of soil (g) after drying at 105 °C to constant weight, and is

the volume of the cutting ring (cm³).

Gravimetric water content (WC, %) was computed as

where is the fresh mass of soil before drying.

**S1.2 Soil organic carbon and other chemical properties**

Soil organic carbon (SOC, g kg⁻¹) for each depth interval was determined using the potassium dichromate oxidation method with external heating. Results originally obtained in % were converted to g kg⁻¹. Soil pH was measured in a 1:2.5 soil–water suspension. Total nitrogen (TN, g kg⁻¹), available phosphorus (AP, mg kg⁻¹), available potassium (AK, mg kg⁻¹), and electrical conductivity (EC, µS cm⁻¹) were measured following standard procedures described in the main text and expressed in the units indicated in Tables 1 and S2.

**Text S2. Statistical analyses and model diagnostics**

All statistical analyses were conducted in R (version 4.5.1; R Core Team, Vienna, Austria). Prior to modelling, variables were visually inspected using histograms and Q–Q plots, and transformed if strongly skewed (log10- or square-root transformation). Unless otherwise stated, reported results are based on untransformed values for ease of interpretation.

**S2.1 Linear mixed-effects models for distance effects**

To quantify how soil properties and heavy metals change with distance from the road while accounting for transect-level non-independence, linear mixed-effects models (LMMs) were fitted using the *lme4* and *lmer*Test packages. For each response variable Y (SOC, BD, WC, pH, EC, TN, AP and each metal), the following model was specified:

whereindexes sampling points and indexes transect (lines). The fixed effect represents the average slope of along the distance gradient, is a random intercept for transect , and is the residual error.

Model parameters were estimated by restricted maximum likelihood. Significance of fixed effects was evaluated using Satterthwaite’s degrees of freedom as implemented in lmerTest. Marginal and conditional coefficients of determination (R²) were calculated with the performance package to quantify the variance explained by fixed effects alone and by the full mixed model, respectively. The detailed LMM outputs are summarized in Table S4.

**S2.2 Segmented regression for SOC–distance relationships**

Because visual inspection suggested a breakpoint in the SOC–distance relationship, segmented (piecewise) linear regression was applied using the segmented package. Starting from a simple linear model , a single breakpoint along the distance gradient was estimated as

where and denote the slopes below and above the breakpoint, respectively. The initial value for was set to the median distance, and its final estimate and confidence interval were obtained iteratively.

The Davies test, as implemented in segmented, was used to assess whether a significant change in slope occurred along the distance gradient. Model fit was evaluated based on R² derived from predicted versus observed SOC. Summary statistics of the breakpoint, its 95% confidence interval, segment slopes and Davies test p-value are provided in Table S5.

**S2.3 Principal component analysis of soil–metal gradients**

To explore joint patterns among soil properties and metal concentrations, principal component analysis (PCA) was performed on standardized (z-score) variables: WC, EC, pH, BD, SP, AK, AP, TN, SOC, Cr, Ni, Cu, Zn and Cd. PCA was carried out using the covariance matrix of standardized variables, so that each variable contributed equally regardless of its original units.

Loadings of each variable on the first two principal components (PC1 and PC2) are reported in Table S6. Eigenvalues, the percentage of variance explained by each component and cumulative variance are given in Table S7. Loadings with absolute values greater than 0.4 (|loading| > 0.4) were interpreted as strong contributions to the corresponding component.

**S2.4 Model diagnostics and additional tests**

For all regression models, residuals were inspected for normality and homoscedasticity using Q–Q plots and residual-versus-fitted plots. When necessary, heteroscedasticity-robust standard errors were computed to confirm the robustness of significance levels. Spearman’s rank correlations among SOC, soil properties and metal concentrations were additionally calculated to characterize their pairwise associations along the distance gradient (results not shown).

**Table S1. Site and sampling design information**

| **Plot-ID** | **The distance from the construction site (m)** | **Latitude**  **[degrees north]** | **Longitude**  **[degrees east]** | **Altitude**  **(m)** | **Depth**  **(cm)** |
| --- | --- | --- | --- | --- | --- |
| L1-1 | 5 | 26.0312427 | 119.6101613 | 4.49 | 0-10 |
| L1-2 | 10 | 26.0312801 | 119.6102005 | 4.25 | 0-10 |
| L1-3 | 15 | 26.0313132 | 119.6102398 | 4.04 | 0-10 |
| L1-4 | 20 | 26.0313468 | 119.6102787 | 3.87 | 0-10 |
| L1-5 | 25 | 26.0313810 | 119.6103165 | 3.77 | 0-10 |
| L1-6 | 30 | 26.0314172 | 119.6103535 | 3.75 | 0-10 |
| L1-7 | 35 | 26.0314516 | 119.6103935 | 3.86 | 0-10 |
| L1-8 | 40 | 26.0314913 | 119.6104285 | 3.79 | 0-10 |
| L1-9 | 45 | 26.0315223 | 119.6104644 | 3.81 | 0-10 |
| L1-10 | 50 | 26.0315541 | 119.6104987 | 3.86 | 0-10 |
| L1-11 | 55 | 26.0315864 | 119.6105354 | 3.79 | 0-10 |
| L1-12 | 60 | 26.0316192 | 119.6105691 | 3.75 | 0-10 |
| L1-13 | 65 | 26.0316492 | 119.6106066 | 3.75 | 0-10 |
| L1-14 | 70 | 26.0316803 | 119.6106430 | 3.76 | 0-10 |
| L2-1 | 5 | 26.0309055 | 119.6104950 | 4.35 | 0-10 |
| L2-2 | 10 | 26.0309362 | 119.6105334 | 4.01 | 0-10 |
| L2-3 | 15 | 26.0309668 | 119.6105701 | 4.05 | 0-10 |
| L2-4 | 20 | 26.0309977 | 119.6106074 | 4.21 | 0-10 |
| L2-5 | 25 | 26.0310284 | 119.6106448 | 4.27 | 0-10 |
| L2-6 | 30 | 26.0310582 | 119.6106831 | 4.24 | 0-10 |
| L2-7 | 35 | 26.0310904 | 119.6107215 | 4.19 | 0-10 |
| L2-8 | 40 | 26.0311203 | 119.6107594 | 4.21 | 0-10 |
| L2-9 | 45 | 26.0311509 | 119.6107968 | 4.23 | 0-10 |
| L2-10 | 50 | 26.0311812 | 119.6108338 | 4.21 | 0-10 |
| L2-11 | 55 | 26.0312112 | 119.6108714 | 4.17 | 0-10 |
| L2-12 | 60 | 26.0312410 | 119.6109092 | 4.28 | 0-10 |
| L2-13 | 65 | 26.0312722 | 119.6109454 | 4.29 | 0-10 |
| L2-14 | 70 | 26.0313048 | 119.6109855 | 4.17 | 0-10 |
| L3-1 | 5 | 26.0305577 | 119.6108449 | 4.61 | 0-10 |
| L3-2 | 10 | 26.0305889 | 119.6108827 | 4.5 | 0-10 |
| L3-3 | 15 | 26.0306204 | 119.6109195 | 4.56 | 0-10 |
| L3-4 | 20 | 26.0306520 | 119.6109576 | 4.69 | 0-10 |
| L3-5 | 25 | 26.0306831 | 119.6109967 | 4.62 | 0-10 |
| L3-6 | 30 | 26.0307159 | 119.6110341 | 4.54 | 0-10 |
| L3-7 | 35 | 26.0307513 | 119.6110796 | 4.49 | 0-10 |
| L3-8 | 40 | 26.0307827 | 119.6111159 | 4.61 | 0-10 |
| L3-9 | 45 | 26.0308136 | 119.6111534 | 4.79 | 0-10 |
| L3-10 | 50 | 26.0308452 | 119.6111910 | 4.83 | 0-10 |
| L3-11 | 55 | 26.0308786 | 119.6112308 | 4.80 | 0-10 |
| L3-12 | 60 | 26.0309091 | 119.6112677 | 4.77 | 0-10 |
| L3-13 | 65 | 26.0309412 | 119.6113045 | 4.74 | 0-10 |
| L3-14 | 70 | 26.0309714 | 119.6113425 | 4.68 | 0-10 |
| L4-1 | 5 | 26.0302079 | 119.6111948 | 4 | 0-10 |
| L4-2 | 10 | 26.0302380 | 119.6112328 | 3.84 | 0-10 |
| L4-3 | 15 | 26.0302682 | 119.6112703 | 3.68 | 0-10 |
| L4-4 | 20 | 26.0302988 | 119.6113085 | 3.55 | 0-10 |
| L4-5 | 25 | 26.0303286 | 119.6113453 | 3.62 | 0-10 |
| L4-6 | 30 | 26.0303601 | 119.6113828 | 3.74 | 0-10 |
| L4-7 | 35 | 26.0303899 | 119.6114196 | 3.79 | 0-10 |
| L4-8 | 40 | 26.0304195 | 119.6114572 | 3.85 | 0-10 |
| L4-9 | 45 | 26.0304486 | 119.6114948 | 3.86 | 0-10 |
| L4-10 | 50 | 26.0304783 | 119.6115326 | 3.84 | 0-10 |
| L4-11 | 55 | 26.0305101 | 119.6115690 | 3.9 | 0-10 |
| L4-12 | 60 | 26.0305398 | 119.6116061 | 4.06 | 0-10 |
| L4-13 | 65 | 26.0305695 | 119.6116437 | 4.26 | 0-10 |
| L4-14 | 70 | 26.0306012 | 119.6116805 | 4.43 | 0-10 |

**Table S2.** **Summary statistics of soil properties in different distance classes from the road.**

| Distance class (m) | n | SOC  (g kg-1) | BD  (g cm-3) | WC  (%) | pH | TN  (g kg-1) | AP  (mg kg-1) | EC  (µS cm-1) |  |
| --- | --- | --- | --- | --- | --- | --- | --- | --- | --- |
| 0–30 | 24 | 14.84±3.59 | 0.910±0.053 | 32.6±4.4 | 6.95±0.70 | 1.32±0.31 | 2.7±0.3 | 837.1±65.2 | |
| 30–50 | 16 | 18.54±1.41 | 0.810±0.026 | 44.6±2.6 | 5.82±0.63 | 1.59±0.12 | 2.7±0.3 | 751.8± 41.6 | |
| > 50 | 16 | 16.91±0.45 | 0.776±0.047 | 50.5±3.1 | 5.81±0.31 | 1.52±0.05 | 2.7±0.3 | 707.4±36.9 | |

**Notes:** Values are means ± standard deviations for the 0–10 cm soil layer. Distance classes correspond to near-road (0–30 m), intermediate (30–50 m), and far (> 50 m) zones along the transects. n is the number of samples in each distance class.

**Table S3. Summary statistics of heavy metal concentrations at different distances from the road**

| **The distance from the construction site (m)** | **Cr**  **（mg·kg-1)** | **Ni**  **（mg·kg-1)** | **Cu**  **（mg·kg-1)** | **Zn**  **（mg·kg-1)** | **Cd**  **（mg·kg-1)** |
| --- | --- | --- | --- | --- | --- |
| 5 | 140.85±15.49 | 46.76±5.61 | 66.58±7.32 | 170.65±15.36 | 1.65±0.13 |
| 10 | 119.21±13.11 | 42.20±5.06 | 55.65±6.12 | 142.58±12.83 | 1.66±0.13 |
| 15 | 97.86±10.77 | 37.97±4.56 | 51.74±5.69 | 151.27±13.61 | 1.52±0.12 |
| 20 | 87.97±9.68 | 35.77±4.29 | 48.17±5.30 | 122.57±11.03 | 1.50±0.12 |
| 25 | 76.28±8.39 | 35.73±4.29 | 47.63±5.24 | 112.53±10.13 | 1.32±0.11 |
| 30 | 76.97±8.47 | 36.11±4.33 | 43.21±4.75 | 133.27±11.99 | 1.45±0.12 |
| 35 | 77.04±8.47 | 35.44±4.25 | 39.67±4.36 | 99.09±8.92 | 1.45±0.12 |
| 40 | 75.41±8.29 | 34.63±4.16 | 41.12±4.52 | 87.13±7.84 | 1.33±0.11 |
| 45 | 69.08±7.60 | 33.93±4.07 | 38.22±4.20 | 86.58±7.79 | 1.26±0.10 |
| 50 | 76.55±8.42 | 32.71±3.92 | 35.13±3.87 | 88.23±7.94 | 1.28±0.10 |
| 55 | 73.22±8.05 | 33.26±3.99 | 34.42±3.79 | 79.32±7.14 | 1.33±0.11 |
| 60 | 68.54±7.54 | 34.21±4.11 | 36.64±4.03 | 66.88±6.02 | 1.41±0.11 |
| 65 | 63.82±7.02 | 28.82±3.46 | 35.33±3.89 | 69.24±6.23 | 1.33±0.11 |
| 70 | 64.38±7.08 | 24.67±2.96 | 35.56±3.91 | 68.63±6.18 | 1.55±0.12 |

**Notes:** Heavy metal concentrations (Cr, Ni, Cu, Zn and Cd) are expressed in mg kg⁻¹. Values are means ± standard deviations for the 0–10 cm soil layer at each distance from the road construction site.

**Table S4 Fixed‐effect estimates from linear mixed‐effects models relating soil properties and heavy metals to distance from the road**

| **Variable** | **Term** | **Estimate** | **SE** | **t**  **value** | **95CI**  **lower** | **95CI**  **upper** | **Marginal**  **R2** | **Conditional**  **R2** | **n** |
| --- | --- | --- | --- | --- | --- | --- | --- | --- | --- |
| SOC | Intercept | 13.664 | 0.735 | 18.588 | 12.223 | 15.104 | 0.272 | 0.300 | 56 |
| SOC | distance | 0.075 | 0.016 | 4.626 | 0.043 | 0.107 | 0.272 | 0.300 | 56 |
| BD | Intercept | 0.965 | 0.011 | 86.739 | 0.943 | 0.987 | 0.789 | 0.820 | 56 |
| BD | distance | -0.003 | 0.000 | -15.534 | -0.004 | -0.003 | 0.789 | 0.820 | 56 |
| WC | Intercept | 26.015 | 0.78 | 33.356 | 24.486 | 27.544 | 0.922 | 0.934 | 56 |
| WC | distance | 0.404 | 0.015 | 27.71 | 0.375 | 0.432 | 0.922 | 0.934 | 56 |
| pH | Intercept | 7.317 | 0.214 | 34.252 | 6.898 | 7.735 | 0.440 | 0.567 | 56 |
| pH | distance | -0.027 | 0.004 | -7.473 | -0.034 | -0.020 | 0.440 | 0.567 | 56 |
| EC | Intercept | 891.246 | 22.057 | 40.407 | 848.016 | 934.476 | 0.631 | 0.918 | 56 |
| EC | distance | -3.082 | 0.15 | -20.523 | -3.376 | -2.787 | 0.631 | 0.918 | 56 |
| AP | Intercept | 2.745 | 0.112 | 24.532 | 2.526 | 2.965 | 0.007 | 0.333 | 56 |
| AP | distance | -0.001 | 0.002 | -0.767 | -0.005 | 0.002 | 0.007 | 0.333 | 56 |
| TN | Intercept | 1.207 | 0.058 | 20.891 | 1.094 | 1.320 | 0.305 | – | 56 |
| TN | distance | 0.007 | 0.001 | 4.908 | 0.004 | 0.009 | 0.305 | – | 56 |
| Cr | Intercept | 116.318 | 3.432 | 33.889 | 109.591 | 123.045 | 0.69 | – | 56 |
| Cr | distance | -0.892 | 0.081 | -11.063 | -1.050 | -0.734 | 0.69 | – | 56 |
| Ni | Intercept | 38.226 | 2.055 | 18.603 | 34.199 | 42.253 | 0.065 | 0.073 | 56 |
| Ni | distance | -0.093 | 0.048 | -1.957 | -0.187 | 0.000 | 0.065 | 0.073 | 56 |
| Cu | Intercept | 59.838 | 2.019 | 29.636 | 55.880 | 63.795 | 0.788 | 0.850 | 56 |
| Cu | distance | -0.533 | 0.031 | -16.984 | -0.595 | -0.472 | 0.788 | 0.850 | 56 |
| Zn | Intercept | 162.967 | 5.000 | 32.591 | 153.167 | 172.768 | 0.851 | 0.909 | 56 |
| Zn | distance | -1.543 | 0.068 | -22.645 | -1.677 | -1.409 | 0.851 | 0.909 | 56 |
| Cd | Intercept | 0.848 | 0.025 | 33.308 | 0.798 | 0.898 | 0.667 | 0.790 | 56 |
| Cd | distance | -0.005 | 0.000 | -13.210 | -0.005 | -0.004 | 0.667 | 0.790 | 56 |

**Notes:** Linear mixed-effects models were fitted as Y ~ distance + (line), with sampling line treated as a random intercept. Marginal R² represents the variance explained by fixed effects only, and conditional R² represents the variance explained by both fixed and random effects. For variables where the random intercept variance was estimated as zero (singular fit), conditional R² is not reported (shown as “–”). All models were fitted on untransformed data.

**Table S5 Segmented regression results for the relationship between SOC and distance from the road**

| **Response** | **Breakpoint ψ (m)** | **95% CI lower** | **95% CI upper** | **Slope segment 1** | **Slope segment 2** | **P value for ψ** | **R2** | **n** |
| --- | --- | --- | --- | --- | --- | --- | --- | --- |
| SOC | 29.89 | 26.98 | 32.8 | 0.384 | -0.083 | 1.58E-17 | 0.86 | 56 |

**Table S6 Loadings of soil properties and heavy metals on the first two principal components**

| **Variable** | **PC1-loading** | **PC2-loading** |
| --- | --- | --- |
| WC | 0.323 | -0.023 |
| EC | -0.330 | -0.023 |
| pH | -0.307 | 0.279 |
| BD | -0.327 | -0.042 |
| SP | 0.327 | 0.042 |
| AK | 0.082 | 0.630 |
| AP | -0.128 | 0.123 |
| TN | 0.258 | -0.045 |
| SOC | 0.254 | -0.135 |
| Cr | -0.315 | -0.038 |
| Ni | -0.061 | -0.615 |
| Cu | -0.317 | 0.035 |
| Zn | -0.319 | 0.043 |
| Cd | -0.136 | -0.319 |

**Notes:** Principal component analysis (PCA) was performed on standardized (z-score) variables: WC, EC, pH, BD, SP, AK, AP, TN, SOC, Cr, Ni, Cu, Zn and Cd. Loadings with absolute values greater than 0.4 (|loading| > 0.4) were considered to indicate strong contributions to the corresponding component.

**Table S7 Eigenvalues and variance explained by principal components**

| **Component** | **Eigenvalue** | **Variance explained (%)** | **Cumulative (%)** |
| --- | --- | --- | --- |
| PC1 | 8.954 | 64 | 64 |
| PC2 | 1.55 | 11.1 | 75 |
| PC3 | 1.233 | 8.8 | 83.8 |
| PC4 | 0.846 | 6 | 89.9 |
| PC5 | 0.587 | 4.2 | 94.1 |
| PC6 | 0.427 | 3 | 97.1 |
| PC7 | 0.248 | 1.8 | 98.9 |
| PC8 | 0.093 | 0.7 | 99.6 |
| PC9 | 0.033 | 0.2 | 99.8 |
| PC10 | 0.017 | 0.1 | 99.9 |
| PC11 | 0.006 | 0 | 100 |
| PC12 | 0.005 | 0 | 100 |
| PC13 | 0 | 0 | 100 |
| PC14 | 0 | 0 | 100 |
